# Supplementary material for: MiR-3150b-3p inhibits the proliferation and invasion of cervical cancer cells by targeting TNFRSF11a
Source: PubMed Central journal article supplement — J Investig Med. 2020 Jul 2;68(6):1166–70. doi: 10.1136/jim-2020-001284 (PMC7418629; doi:10.1136/jim-2020-001284), 2020-07-02

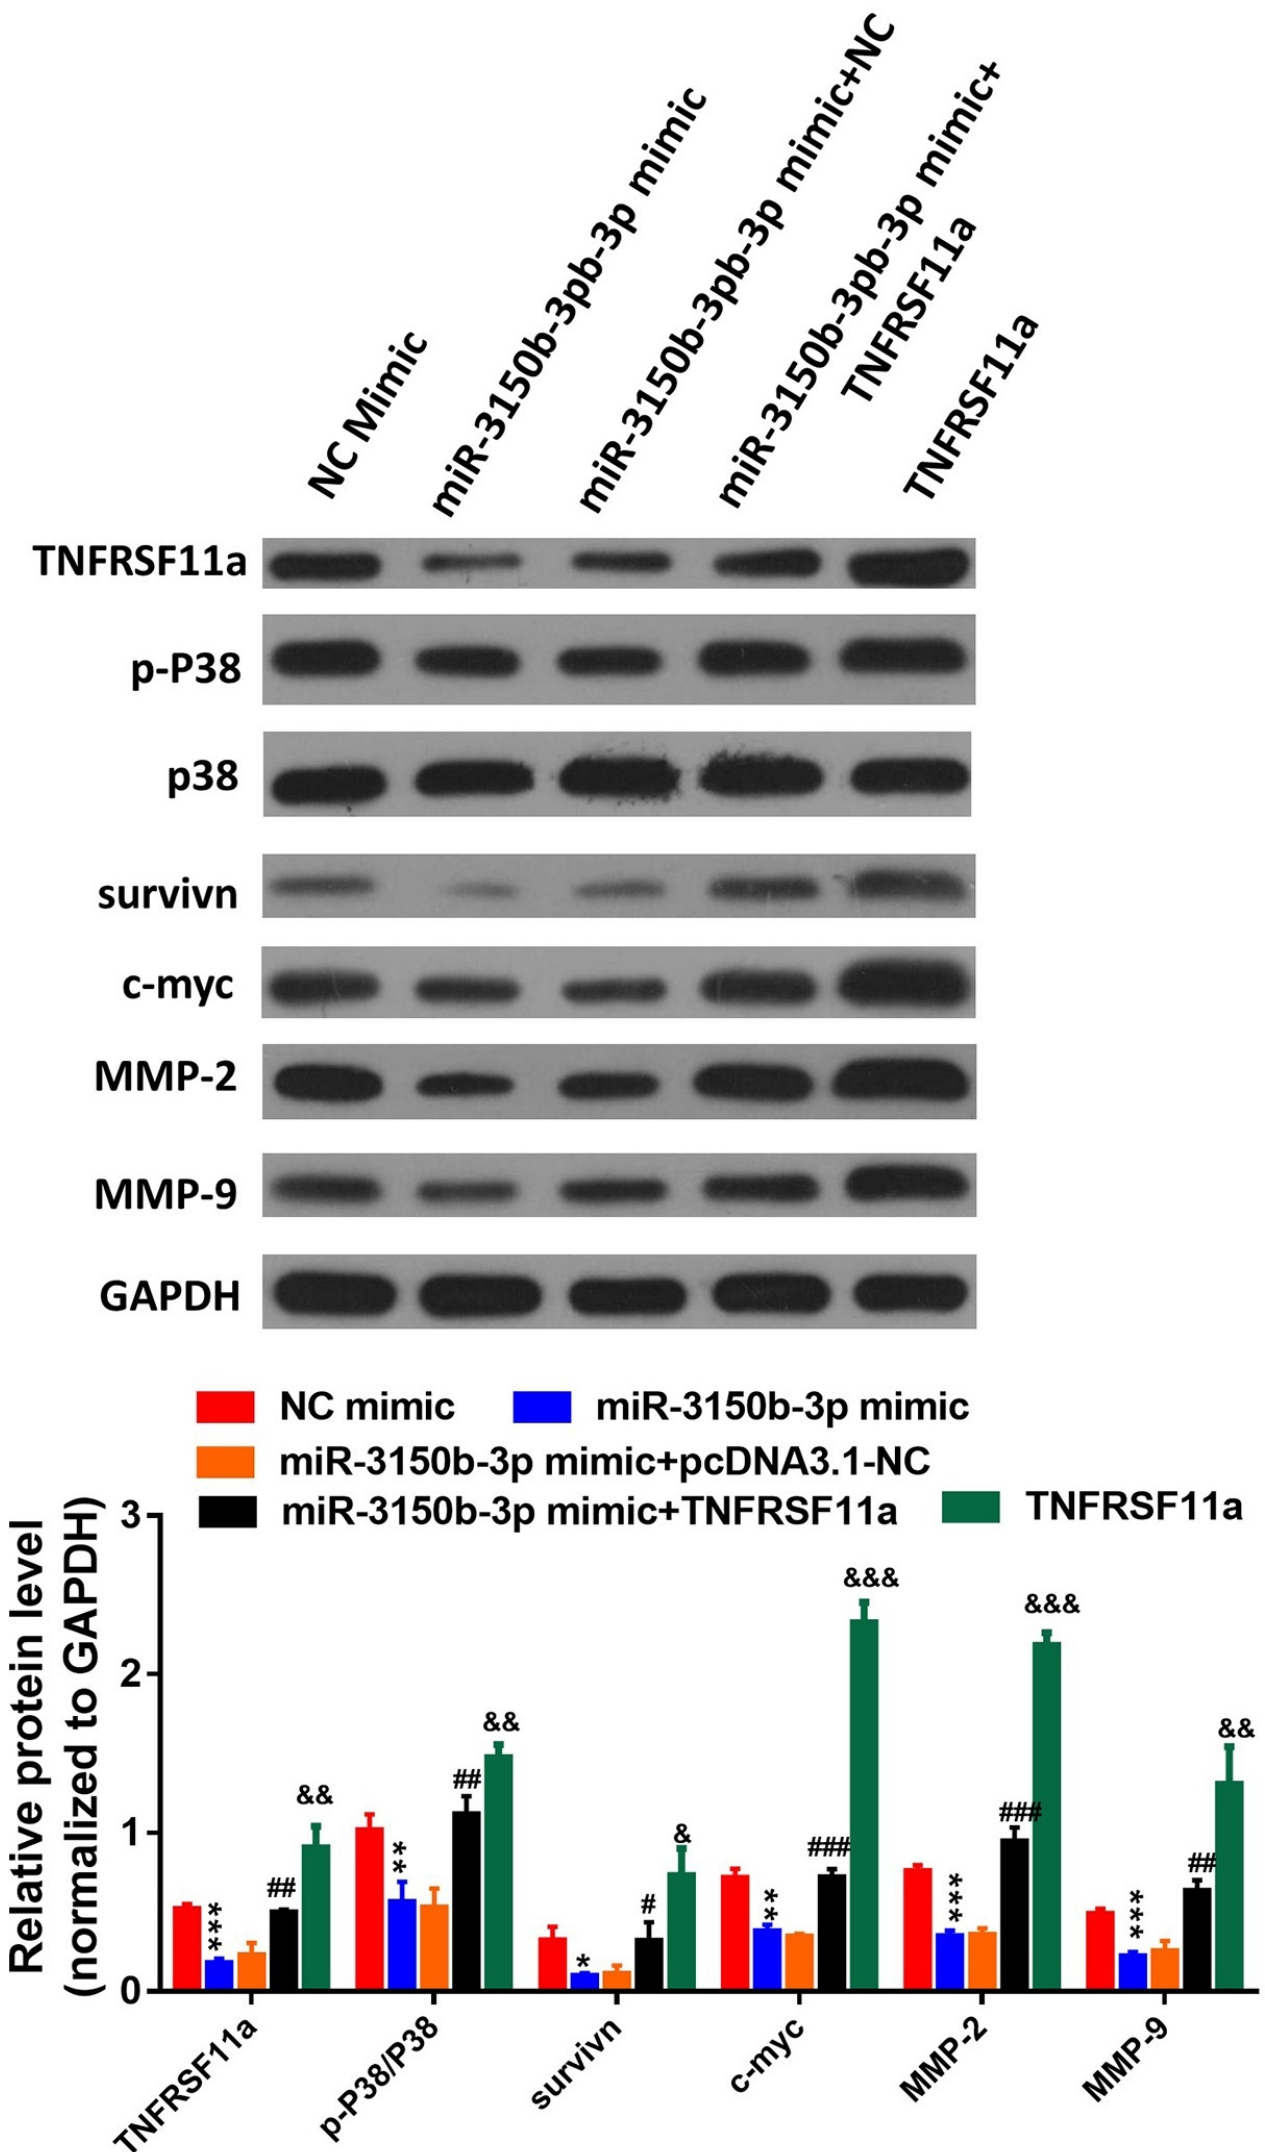

Supplement: jim-2020-001284supp001.pdf [file jim-2020-001284supp001.pdf]
